# Supplementary material for: Identification of EnvC and Its Cognate Amidases as Novel Determinants of Intrinsic Resistance to Cationic Antimicrobial Peptides
Source: PubMed Central journal article supplement (PMC4808223; doi:10.1128/aac.02699-15), 2016-03-25
Supplement: AAC.02699-15_zac004165025so1.pdf [file AAC.02699-15_zac004165025so1.pdf]

1 **SUPPLEMENTAL MATERIAL**

2 **Supplemental Methods**

3 **TABLE S1** Strains and plasmids used in this study

4 **TABLE S2** Primers used in this study

5 **TABLE S3** Mutants identified as putatively hypersusceptible or hyper-resistant to HNP-1

6 **TABLE S4** MICs of HNP-1 and LL-37 against  $\Delta envC$

7 **TABLE S5** Proteins whose expression level is altered in the  $\Delta envC$  mutant relative to WT<sub>Ec</sub>

8 **FIG S1** Cationic antimicrobial peptides used in this study

9 **FIG S2** The neighboring genes of *envC*, *amiA*, *amiB*, and *nlpD* are not involved in CAMP  
10 resistance

11 **FIG S3** EnvC and its cognate amidases do not degrade HNP-1.

12 **FIG S4** The *E. coli*  $\Delta envC$  mutant exhibits altered outer membrane permeability

13 **FIG S5** Microscopic examination of the *E. coli* wild-type and  $\Delta envC$  strains

14 **FIG S6** Inactivation of *envC* does not alter the length and distribution of LPS

15 **FIG S7** The *E. coli*  $\Delta envC$  mutant exhibits altered surface properties

16 **FIG S8** Membrane and periplasmic protein profiles of the *E. coli* wild-type and  $\Delta envC$  strains

17 **FIG S9** The *E. coli*  $\Delta nlpD$  and  $\Delta amiC$  mutants are hypersusceptible to LL-37, but not to HNP-1

18 **Supplemental References**

19

## 20 **Supplemental Methods**

21 **Determination of minimal inhibitory concentration (MIC) of antimicrobial peptides.** MICs  
22 of HNP-1 and LL-37 were determined using the protocol of Turner *et al.* (1). This protocol uses  
23 “refined Mueller-Hinton broth (MHB)”, instead of standard MHB (BBL 211443; Becton  
24 Dickinson), in which antimicrobial peptides such as PG-1 and LL-37 precipitate. Refined MHB  
25 was prepared by filtering standard MHB through a series of three Sep-Pak Aminopropyl (NH<sub>2</sub>)  
26 Plus columns (WAT020535; Waters). Bacterial strains were grown overnight in refined MHB  
27 and diluted 100-fold in fresh refined MHB. After grown to mid-log phase, cell density was  
28 adjusted to  $\sim 2 \times 10^5$  CFU/ml with refined MHB. Cell suspension (90  $\mu$ l) was mixed with 10  $\mu$ l of  
29 10 $\times$  stock solutions of HNP-1 or LL-37 in 96-well polypropylene microtiter plates (Cat. No.  
30 3790; Costar) and incubated for 24 h at 37°C, without shaking. The next day, cell growth was  
31 visually inspected for determination of MIC.

32 **Construction of SUMO-fusion protein overexpression plasmids.** Plasmids pET-SUMO-  
33 AmiA, pET-SUMO-AmiB, pET-SUMO-AmiC, pET-SUMO-NlpD and pET-SUMO-EnvC were  
34 constructed as follows. A DNA fragment containing a gene coding for *amiA*, *amiB*, *amiC*, *nlpD*  
35 or *envC* but lacking a signal peptide region was amplified by PCR with wild-type *E. coli*  
36 MG1655 chromosomal DNA as template. Primers used in PCR for each gene are listed in Table  
37 S2. The amplified PCR fragments were purified and cloned into linearized TA-cloning plasmid  
38 pET-SUMO (Champion™ pET SUMO Expression System, ThermoFisher Scientific). Resulting  
39 plasmids (pET-SUMO-AmiA, pET-SUMO-AmiB, pET-SUMO-AmiC, pET-SUMO-NlpD, and  
40 pET-SUMO-EnvC) were verified by sequencing and transformed into a host strain *E. coli*  
41 BL21(DE3). In each of the overexpression plasmids, all proteins were overexpressed with a  
42 His<sub>6</sub>-SUMO (H-SUMO) tag fused to their N-termini.

43 **Purification of AmiA, AmiB, AmiC, NlpD, and EnvC proteins.** *E. coli* strains carrying  
44 respective overexpression plasmids were grown in LB. Overnight cultures were diluted 200-fold  
45 into 300 ml of LB supplemented with kanamycin (50 µg/ml) and glucose (0.05%). After growing  
46 cultures to an OD<sub>600</sub> of ~0.4 at 30°C, IPTG was added to a final concentration of 0.5 mM, and  
47 growth was continued for an additional 3-4 h. Cells were harvested by centrifugation, and cell  
48 pellets were stored at -80°C until use for protein purification. For purification, cell pellets were  
49 thawed on ice and resuspended in 15 ml of cold Buffer A (50 mM Tris-HCl, pH 8.0, 300 mM  
50 NaCl, 10% glycerol) containing 20 mM imidazole. The cells were disrupted by using French  
51 Press, and cell debris and membranes were removed by centrifugation at 10,000 × g for 20 min  
52 at 4°C. Fusion proteins in the soluble fraction were purified using the ProPur™ IMAC Kit  
53 (NUNC). Each protein was overexpressed and purified with a His<sub>6</sub>-SUMO (H-SUMO) tag fused  
54 to its N-terminus. Following purification of an H-SUMO fusion protein, the H-SUMO tag was  
55 removed by using His<sub>6</sub>-tagged SUMO protease (H-SP, Invitrogen). Cleavage reactions were  
56 passed through Ni-NTA resin to remove free H-SUMO and H-SP, yielding a pure preparation of  
57 the desired protein without added non-native amino acid residues. The only exception was AmiB  
58 where the extra sequence CSSG was left at its N-terminus (Fig. S4A).

59 **Preparation of dye-labeled sacculi.** Sacculi were prepared with cells of an *E. coli* BW25113  
60  $\Delta lpp$  strain as described by Uehara *et al* (2, 3). Cells were grown overnight in LB, and diluted  
61 100-fold in 1 L of LB. After growing cultures to OD<sub>600</sub> ~0.5, cells were harvested by  
62 centrifugation and resuspended in 20 ml of PBS. The resulting cell suspension was added to 80  
63 ml of boiling 5% SDS with vigorous stirring. The samples were boiled for 30 min, and incubated  
64 overnight at room temperature. The next day, sacculi were sedimented by ultracentrifugation at  
65 100,000 × g for 1 h at 25°C. The pellets were washed three times with water, resuspended in 1

66 ml of water, mixed with  $\alpha$ -amylase (a final concentration of 200  $\mu\text{g/ml}$ , Sigma A6380), and  
67 incubated for 2 h at 37°C. After adding 110  $\mu\text{l}$  of 10% SDS, the mixture was further incubated  
68 for 1 h at 95°C. Sacculi were pelleted by centrifugation at  $100,000 \times g$  for 30 min at room  
69 temperature and washed five times each with 1 ml of water. The final pellet was dissolved in 1  
70 ml of water containing 0.02% sodium azide and stored at 4°C. To label with the dye Remazol  
71 Brilliant Blue R (RBB) (Sigma, R8001), 1 ml of the purified sacculi was mixed with 200  $\mu\text{l}$  of  
72 0.2 M RBB and 83  $\mu\text{l}$  of 6 M NaOH. After adjusting the mixture volume to 10 ml with water, the  
73 mixture was incubated overnight at 37°C. The next day, 83  $\mu\text{l}$  of 6 M HCl was added to  
74 neutralize pH and 200  $\mu\text{l}$  of 10  $\times$  PBS. Labeled sacculi were pelleted (13,200 rpm  $\times$  30 min,  
75 room temperature) and washed with water until the supernatant become clear. Finally, the dye-  
76 labeled sacculi were resuspended in 2 ml water containing 0.2% azide, incubated for 3 h at 65°C  
77 to inactivate possibly contaminating lysozyme, and stored at 4°C.

78 **Peptidoglycan degradation assay using the dye-labeled peptidoglycan.** The assay was  
79 performed as described by Uehara *et al* (3), with a slight modification. Ten  $\mu\text{l}$  of RBB-labelled  
80 sacculi were incubated for 3 h at 37°C with purified amidases (AmiA, AmiB, or AmiC; a final  
81 concentration of  $\sim 3 \mu\text{g/ml}$ ) and/or their cognate accessory proteins (EnvC or NlpD; a final  
82 concentration of  $\sim 3 \mu\text{g/ml}$ ) in 50  $\mu\text{l}$  of PBS buffer (10 mM  $\text{Na}_2\text{HPO}_4$ , 2 mM  $\text{KH}_2\text{PO}_4$ , 137 mM  
83 NaCl and 2.7 mM KCl, pH 7.4). Reactions were terminated by incubating them at 95°C for 5  
84 min, followed by centrifugation at  $21,000 \times g$  for 20 min at room temperature. Supernatants were  
85 removed and their absorbance was measured at 595 nm using NanoDrop (Fig. S4C).

86 **Antimicrobial peptide degradation assay.** Purified amidases (AmiA, AmiB, or AmiC; a final  
87 concentration of  $\sim 3 \mu\text{g/ml}$ ) and/or their cognate accessory proteins (EnvC or NlpD; a final  
88 concentration of  $\sim 3 \mu\text{g/ml}$ ) were incubated with HNP-1 (1  $\mu\text{g}$ ) for 10 h at 37°C (Fig. S4D) or

89 LL-37 (1  $\mu$ g; data not shown) in 20  $\mu$ l of PBS buffer (10 mM  $\text{Na}_2\text{HPO}_4$ , 2 mM  $\text{KH}_2\text{PO}_4$ , 137  
90 mM NaCl and 2.7 mM KCl, pH 7.4) with or without additional  $\text{CaCl}_2$ ,  $\text{MgCl}_2$ , or  $\text{ZnCl}_2$  at a final  
91 concentration of 1 mM. Reactions were terminated by adding 6  $\mu$ l of 4  $\times$  sample loading buffer  
92 (12% SDS, 6% mercaptoethanol, 30% glycerol, 0.05% Coomassie blue G-250, 150 mM  
93 Tris/HCl, pH 7.0) and boiling for 5 min and were run on 16% Tricine-SDS PAGE (4) and  
94 visualized by Coomassie Brilliant Blue staining.

95 **Transmission electron microscopy.** Bacterial cells were grown overnight in 2 ml of LB,  
96 diluted 1:100 in 50 ml of LB, and grown to  $\text{OD}_{600} \sim 0.5$ . Cells were pelleted by centrifugation at  
97 8,000 rpm in a Beckman Coulter Avanti J-E, washed three times with 0.1 M Sorensen phosphate  
98 buffer, and fixed with 1 ml 2.5% glutaraldehyde in 0.1 M Sorensen phosphate buffer.

99 Dispersed/re-suspended cells were stored in the suspension at 4°C and transferred to the UIC  
100 electron microscopy facility on ice where cells were post-fixed in 1% osmium tetroxide,  
101 dehydrated in a series of ascending ethanol using propylene oxide as transitional solvent, and  
102 embedded and cured in Epoxy Resin Lx112. Thin cut sections (83 nm) were placed on 200 mesh  
103 copper standard grids and stained with 2% uranyl acetate and Reynolds lead citrate for viewing  
104 on Jeol Jem 1220 transmission electron microscope. Digital images were acquired with Gatan  
105 Erlangshen ES 10000 W Model 785 digital camera with digital micrograph software program  
106 1.7.1 Digital Micrograph DM.

107 **Lipopolysaccharide (LPS) purification and detection by immunoblot.** For LPS preparation,  
108 cells were grown overnight in 2 ml of LD medium (5) (1% tryptone, 0.5% yeast extract, and  
109 0.5% NaCl) at 37°C with shaking. The overnight culture was adjusted to  $\text{OD}_{600} \sim 0.5$  for LPS  
110 extraction using the method described by Davis and Goldberg (6). For immunodetection of LPS,  
111 10  $\mu$ l of LPS samples were separated on a 12.5% Tris-Tricine PAGE and electro-transferred onto

112 0.45 micron nitrocellulose membrane (OSMONICS WP4HY00010) in semi-dry Bjerrum  
113 Schafer-Nielsen transfer buffer (Tris Base, 5.82 g/l; glycerine, 2.93 g/l; and 20% methanol) using  
114 BioRad Trans-Blot Turbo transfer system. The membrane was incubated overnight with a  
115 blocking buffer (1% casein, 20 mM Tris, 500 mM NaCl, and 0.05 % Tween 20) at 4°C, and  
116 further incubated for 1 h at 25°C with mouse monoclonal anti-LPS antibody diluted 1:100  
117 (Hycult biotech). The membrane was then washed six times for 5 min each, incubated at room  
118 temperature for 1 h with fluorescein horse anti-mouse IgG antibodies (Vector laboratories)  
119 diluted 1:1000, and finally imaged using Typhoon scanner.

120 For detection of LPS in membrane fractions, the inner and outer membranes were prepared  
121 by sucrose gradient fractionation as described by Marani *et al.* (7), with a slight modification.  
122 Briefly, cells were grown overnight in LB, diluted 1:100 in 500 ml of LD broth and grown to  
123 OD<sub>600</sub> ~1, and harvested. Cell pellets were resuspended in buffer K (50 mM triethanolamine, 250  
124 mM sucrose, 1 mM EDTA, 1 mM dithiothreitol, 0.1 mg/ml Pefabloc at pH 7.5) and lysed twice  
125 using French Press. After removing cell debris by centrifugation, supernatant samples (~4 ml)  
126 were loaded per tube for 2-step sucrose separation (4 ml of 50% and 70% sucrose on bottom in  
127 14 × 89 mm polyallomer tubes), and centrifuged for 14 h at 39,000 rpm in the SW41 rotor at  
128 4°C. From the top of the tubes, 300 µl fractions were collected and stored at -20°C before use.  
129 Sixteen µl of each fraction was mixed with 2 × SDS sample loading buffer, run on a 12.5% Tris-  
130 Tricine PAGE (BioRad), and subsequently electro-transferred onto 0.45 micron nitrocellulose  
131 membrane as described above. LPS was detected using the same antibodies as described above.  
132 For quality control, NADH oxidase assays were performed as described by Reusch and Burger  
133 (8). Typically, the inner membrane fractions yielded NADH oxidase activity of 0.35-0.4 U/ml  
134 and the outer membrane fractions below 0.1 U/ml for both wild-type *E. coli* and  $\Delta envC$  strains.

135 **Outer and inner membrane protein profiles.** Outer and inner membrane protein samples were  
136 prepared following the protocol from the laboratory of Dr. Robert E. W. Hancock (9). Wild-type  
137 *E. coli* and its isogenic  $\Delta envC$  strains were grown to  $OD_{600} \sim 1.0$  in 500 ml of LB. Cells were  
138 harvested by centrifugation (6,300 rpm  $\times$  20 min, at 4°C), and pellets were frozen and stored at -  
139 80°C until use. Each pellet was resuspended in 10.5 ml of cold lysis solution (10 mM Tris (pH  
140 8.8) containing 20% sucrose, 50  $\mu$ g/ml DNase I, and HALT protease inhibitor cocktail (Thermo  
141 Fisher Scientific) and incubated at room temp for 15 min. Cells were broken twice using French  
142 Press, and cell debris was removed by centrifugation. Supernatant samples (~4 ml) were loaded  
143 per tube for 2-step sucrose separation (4 ml of 50% and 70% sucrose on bottom in 14  $\times$  89 mm  
144 polyallomer tubes), and centrifuged for 14 h at 39,000 rpm in the SW41 rotor at 4°C. Visible  
145 layers were collected (inner membrane layer is reddish/brown above 50% sucrose; outer  
146 membrane layer is white above 70% layer). For quality control, NADH oxidase activity was  
147 measured as described above. Collected samples were then concentrated by centrifugation in  
148 polyallomer centrifuge tubes (8.9 ml capacity) in Type 50 rotor at 49,600 rpm  $\times$  1 h, supernatants  
149 were removed, and final pellets were resuspended in Solubilizer 2 lysis buffer (Invitrogen)  
150 containing 2% CHAPS. Samples (~800  $\mu$ g each in 10  $\mu$ l) were mixed with 143.3  $\mu$ l rehydration  
151 buffer used to rehydrate Zoom strips pH3-10NL (Invitrogen) overnight at 22°C and kept  
152 enclosed within a Styrofoam box containing a moist towel to prevent drying. Remaining steps  
153 were performed as recommended by the Invitrogen Zoom IEF manual, except that TCA  
154 precipitation step was omitted for membrane proteins (10). IEF strips were run on 1.0 mm  $\times$  IPG  
155 NuPAGE Novex 4-12% Bis-Tris Zoom Gels (Invitrogen). Finally, proteins were visualized by  
156 Coomassie staining, and protein spots were excised and sent to UIC Protein Research Laboratory  
157 for identification by mass spectrometry.

158 **Periplasmic protein profiles.** The periplasmic protein samples were prepared by the  
159 chloroform release method (11), with a slight modification. Wild-type *E. coli* and its isogenic  
160  $\Delta envC$  mutant strains were grown to  $OD_{600} \sim 1.0$  in 2 ml of LB, with shaking at 37°C. Cells were  
161 harvested by centrifugation (4,000 rpm  $\times$  10 min, at 4°C), most of the supernatants were  
162 removed, and cell pellets were resuspended in the residual supernatant. To release the  
163 periplasmic proteins, the cell resuspension was mixed with 20  $\mu$ l of chloroform and vortexed,  
164 incubated at room temperature for 15 min, and mixed with 200  $\mu$ l of buffer (10 mM Tris-HCl ,  
165 pH 8.0). Finally, cells were removed by centrifugation (4,000 rpm  $\times$  20 min, at 25°C), and  
166 supernatants containing periplasmic proteins (200  $\mu$ l) were transferred to eppendorf tubes. After  
167 determining protein concentrations using the Pierce BCA Protein Assay Kit, periplasmic protein  
168 samples ( $\sim 20$   $\mu$ g each) were run on 4-20% Mini-PROTEAN® TGX (BioRad), and visualized  
169 with Coomassie Brilliant Blue staining.

170 **Construction of a non-polar *E. coli*  $\Delta nlpD$  mutant.** The 3' region of the *nlpD* gene contains  
171 promoter for the downstream gene *rpoS* (12). A non-polar  $\Delta nlpD$  mutant was constructed using  
172 one-step inactivation method as described by Datsenko and Wanner (13) (see Table S1 and S2 in  
173 the Supplemental Materials for primers and strain information).

174

175



176 **TABLE S1** Strains and plasmids used in this study

| Species or Strain | Relevant genotype or characteristics                                                                                                                                                 | Source or reference |
|-------------------|--------------------------------------------------------------------------------------------------------------------------------------------------------------------------------------|---------------------|
| <i>E. coli</i>    |                                                                                                                                                                                      |                     |
| DH5 $\alpha$      | Host strain used for cloning and plasmid preparation                                                                                                                                 | Laboratory stock    |
| JM109             | Host strain used for cloning and plasmid preparation                                                                                                                                 | Laboratory stock    |
| BW25113           | Parent strain, $\Delta(araD-araB)567 \Delta(rhaD-rhaB)568 \Delta(lacZ4787::rrnB-3) hsdR514 rph-1$                                                                                    | (13, 14)            |
| BW25141           | <i>lacI rrnB</i> <sub>T14</sub> $\Delta lacZ$ <sub>WJ16</sub> $\Delta phoBR580 hsdR514 \Delta araBAD_{AH33} \Delta rhaBAD_{LD78} galU95 endA_{BT333} uidA(\Delta MluI)::pir^+ recA1$ | (13)                |
|                   | $\Delta phnB::Km^r$                                                                                                                                                                  | (15)                |
|                   | $\Delta yhcB::Km^r$                                                                                                                                                                  | (15)                |
|                   | $\Delta pheM::Km^r$                                                                                                                                                                  | (15)                |
|                   | $\Delta nanA::Km^r$                                                                                                                                                                  | (15)                |
|                   | $\Delta fimB::Km^r$                                                                                                                                                                  | (15)                |
|                   | $\Delta yhcM::Km^r$                                                                                                                                                                  | (15)                |
|                   | $\Delta amiB::Km^r$                                                                                                                                                                  | (15)                |
|                   | $\Delta yjbS::Km^r$                                                                                                                                                                  | (15)                |
|                   | $\Delta yjgX::Km^r$                                                                                                                                                                  | (15)                |
|                   | $\Delta glpR::Km^r$                                                                                                                                                                  | (15)                |
|                   | $\Delta mdh::Km^r$                                                                                                                                                                   | (15)                |
|                   | $\Delta pdhR::Km^r$                                                                                                                                                                  | (15)                |
|                   | $\Delta zapB (yiiU)::Km^r$                                                                                                                                                           | (15)                |
|                   | $\Delta envC (yibP)::Km^r$                                                                                                                                                           | (15)                |
|                   | $\Delta yhhN::Km^r$                                                                                                                                                                  | (15)                |
|                   | $\Delta yadM::Km^r$                                                                                                                                                                  | (15)                |
|                   | $\Delta yeeA::Km^r$                                                                                                                                                                  | (15)                |
|                   | $\Delta JW5728::Km^r$                                                                                                                                                                | (15)                |
|                   | $\Delta metA::Km^r$                                                                                                                                                                  | (15)                |
|                   | $\Delta basR::Km^r$                                                                                                                                                                  | (15)                |
|                   | $\Delta yjgH::Km^r$                                                                                                                                                                  | (15)                |
|                   | $\Delta yjdC::Km^r$                                                                                                                                                                  | (15)                |
|                   | $\Delta purH::Km^r$                                                                                                                                                                  | (15)                |
|                   | $\Delta yagF::Km^r$                                                                                                                                                                  | (15)                |
|                   | $\Delta glyS::Km^r$                                                                                                                                                                  | (15)                |
|                   | $\Delta yjgL::Km^r$                                                                                                                                                                  | (15)                |
|                   | $\Delta yddJ::Km^r$                                                                                                                                                                  | (15)                |
|                   | $\Delta yciN::Km^r$                                                                                                                                                                  | (15)                |
|                   | $\Delta pgi::Km^r$                                                                                                                                                                   | (15)                |
|                   | $\Delta yhdY::Km^r$                                                                                                                                                                  | (15)                |
|                   | $\Delta nikD::Km^r$                                                                                                                                                                  | (15)                |
|                   | $\Delta recO::Km^r$                                                                                                                                                                  | (15)                |
|                   | $\Delta iclR::Km^r$                                                                                                                                                                  | (15)                |
|                   | $\Delta yggR::Km^r$                                                                                                                                                                  | (15)                |
|                   | $\Delta pntB::Km^r$                                                                                                                                                                  | (15)                |

|                                |                                                                                                |                 |
|--------------------------------|------------------------------------------------------------------------------------------------|-----------------|
|                                | $\Delta atoA::Km^r$                                                                            | (15)            |
|                                | $\Delta nhaA::Km^r$                                                                            | (15)            |
|                                | $\Delta tatA::Km^r$                                                                            | (15)            |
|                                | $\Delta phoP::Km^r$                                                                            | (15)            |
|                                | $\Delta gpmM::Km^r$                                                                            | (15)            |
|                                | $\Delta yibQ::Km^r$                                                                            | (15)            |
|                                | $\Delta amiC::Km^r$                                                                            | (15)            |
|                                | $\Delta hemF::Km^r$                                                                            | (15)            |
|                                | $\Delta mutL::Km^r$                                                                            | (15)            |
|                                | $\Delta rpoS::Km^r$                                                                            | (15)            |
|                                | $\Delta envC::frt$                                                                             | This study      |
|                                | $\Delta amiA682::Km^r$                                                                         | This study      |
|                                | $\Delta amiB856::Km^r$                                                                         | This study      |
|                                | $\Delta nlpD449::Km^r$                                                                         | This study      |
|                                | $\Delta amiA682::frt$                                                                          | This study      |
|                                | $\Delta amiB856::frt$                                                                          | This study      |
|                                | $\Delta amiC::frt$                                                                             | This study      |
|                                | $\Delta nlpD449::frt$                                                                          | This study      |
|                                | $\Delta envC::frt/penvC_{Ec}$                                                                  | This study      |
|                                | $\Delta yjgX::Km^r/pyjgX_{Ec}$                                                                 | This study      |
| <i>S. enterica</i> Typhimurium |                                                                                                |                 |
| 14028s                         | Parent strain                                                                                  | ATCC            |
|                                | $\Delta envC::Cm^r$                                                                            | This study      |
|                                | $\Delta envC::frt$                                                                             | This study      |
|                                | $\Delta phoP::Tn10$ (MS7953s)                                                                  | E. Groisman Lab |
|                                | $\Delta pmrAB$ (EG13937)                                                                       | E. Groisman Lab |
|                                | $\Delta rfaL::Cm^r$                                                                            | This study      |
|                                | $\Delta rfbB::Cm^r$                                                                            | This study      |
| <hr/>                          |                                                                                                |                 |
| Plasmid                        |                                                                                                |                 |
| pKD46                          | <i>araC bla oriR101 repA101(ts) λ red (gam<sup>+</sup> bet<sup>+</sup> exo<sup>+</sup>)</i>    | (13)            |
| pKD3                           | <i>oriRy bla</i> with the $Cm^r$ cassette flanked by FRT sites                                 | (13)            |
| pKD4                           | <i>oriRy bla</i> with the $Km^r$ cassette flanked by FRT sites                                 | (13)            |
| pCP20                          | FLP (FRT-specific) recombinase, $Amp^r Cm^r$                                                   | (13)            |
| pCL1920                        | pSC101-based with $Spc^r$                                                                      | (16)            |
| <i>penvC</i> <sub>Ec</sub>     | pCL1920 carrying a wild-type copy of the <i>E. coli envC</i> gene with its own upstream region | This study      |
| <i>pzapB</i> <sub>Ec</sub>     | pCL1920 carrying a wild-type copy of the <i>E. coli zapB</i> gene with its own upstream region | This study      |
| <i>pyjgX</i> <sub>Ec</sub>     | pCL1920 carrying a wild-type copy of the <i>E. coli yjgX</i> gene with its own upstream region | This study      |
| pET-SUMO-AmiA                  | Overexpression of AmiA                                                                         | This study      |
| pET-SUMO-AmiB                  | Overexpression of AmiB                                                                         | This study      |
| pET-SUMO-AmiC                  | Overexpression of AmiC                                                                         | This study      |

|               |                        |            |
|---------------|------------------------|------------|
| pET-SUMO-EnvC | Overexpression of EnvC | This study |
| pET-SUMO-NlpD | Overexpression of NlpD | This study |

---

177

178

179

180 **TABLE S2** Primers used in this study

| Name                          | Sequence (5' → 3')   | Purpose                   |
|-------------------------------|----------------------|---------------------------|
| pKD3 Cm F                     | CGCAAGGCGACAAGGTGCT  | To check deletion mutants |
| pKD3 Cm R                     | CCAGCTGAACGGTCTGGTT  | To check deletion mutants |
| pKD4 Km F                     | CCTCGTGCTTTACGGTATC  | To check deletion mutants |
| pKD4 Cm R                     | CCTGCGTGCAATCCATCTT  | To check deletion mutants |
| <sup>a</sup> Ec phnB del CK F | CGAACTACACTTAACTGGCT | To check deletion mutants |
| Ec yhcB del CK F              | GGATTCCACTTCTGTGGAAT | To check deletion mutants |
| Ec pheM del CK F              | GGAGCTAGTCTCCCTCTTTT | To check deletion mutants |
| Ec nanA del CK F              | GCCACTTTAGTGAAGCAGAT | To check deletion mutants |
| Ec fimB del CK F              | GCATGGCGTTTGTATGGCAA | To check deletion mutants |
| Ec yhcM del CK F              | GACTGCATATCGCGTAGTGT | To check deletion mutants |
| Ec amiB del CK F              | GGCCACAACAAGGTACAGG  | To check deletion mutants |
| Ec yjbS del CK F              | CCTCGGCAAATGAGCGAAAT | To check deletion mutants |
| Ec yjgX del CK F              | CCTCTTGCAGTACCAGTGTA | To check deletion mutants |
| Ec glpR del CK F              | GGTTTAGCGATGGCTTTTGT | To check deletion mutants |
| Ec mdh del CK F               | GCAGCGGAGCAACATATCTT | To check deletion mutants |
| Ec pdhR del CK F              | CCTGTATGGACATAAGGTGA | To check deletion mutants |
| Ec yiiU del CK F              | GGTAATCGGGACGAGGATTT | To check deletion mutants |
| Ec yhhN del CK F              | GCGACGACAATTAAGCCAAT | To check deletion mutants |
| Ec yadM del CK F              | GCAGCAGGGAAATATCAGCA | To check deletion mutants |

|                    |                        |                           |
|--------------------|------------------------|---------------------------|
| Ec yeeA del CK F   | GGTGTGTTAACGCGATGAC    | To check deletion mutants |
| Ec basR del CK F   | CGGTATCAGGTTGACCAGAA   | To check deletion mutants |
| Ec metA del CK F   | CTTCAACATGCAGGCTCGA    | To check deletion mutants |
| Ec yjdC del CK F   | GGCCTACCGACAATTCTCTTT  | To check deletion mutants |
| Ec purH del CK F   | GAGCGTTGCGCAAACGTTTT   | To check deletion mutants |
| Ec yagF del CK F   | CGCAGATGTATCAGCTGGAT   | To check deletion mutants |
| Ec glyS del CK F   | GCCTACGAGCGTATTCTGAA   | To check deletion mutants |
| Ec yjgL del CK F   | CGTGATGACTTTTCGCCGTA   | To check deletion mutants |
| Ec yddJ del CK F   | CTGGGAAGAACAATTGCCCTA  | To check deletion mutants |
| Ec yciN del CK F   | GCGTCACACTGTACCTGATA   | To check deletion mutants |
| Ec pgi del CK F    | GCGCTAAGGGTTTACACTCA   | To check deletion mutants |
| Ec yhdY del CK F   | CGCTATTGGCTATCCCGATA   | To check deletion mutants |
| Ec nikD del CK F   | GCGCTGTTTATCAGCGTGAT   | To check deletion mutants |
| Ec recO del CK F   | GCGCGTAAAGACATGCAGGAAA | To check deletion mutants |
| Ec iclR del CK F   | CCACCACGCAACATGAGATT   | To check deletion mutants |
| Ec yggR del CK F   | CTGACTGCAAGCAGCGTAAT   | To check deletion mutants |
| Ec JW5728 del CK F | CGAAGAGCTACCTTTCACCT   | To check deletion mutants |
| Ec nhaA del CK F   | CGCTGATGGCGCAAATTCTT   | To check deletion mutants |
| Ec gpmM del CK R   | CTAAGAACGCTGGCGTAG     | To check deletion mutants |
| Ec envC del CK R   | GACGATGGCAAGTTTGCCA    | To check deletion mutants |

|                       |                                                                       |                                   |
|-----------------------|-----------------------------------------------------------------------|-----------------------------------|
| Ec phoP del CK F      | GTTTACCCCCATAACCACATAAT                                               | To check deletion mutants         |
| pCL1920 seq F         | GCTTCCGGCTCGTATGTTG                                                   | Cloning and Sequencing            |
| pCL1920 seq R         | GTGCTGCAAGGCGATTAAGT                                                  | Cloning and Sequencing            |
| Ec envC npfwd HindIII | CTAGAAGCTTCAACTGCTGATCACCGCTG                                         | Cloning into pCL1920              |
| Ec envC rev BamHI     | CTAGGGATCCACGACGAAATGGAAACAAAAC                                       | Cloning into pCL1920              |
| Ec envC rev2          | GCTGACCTTGCTGGATGGA                                                   | Sequencing                        |
| Ec zapB npFwd HindIII | ATGAAGCTTGAGCGTTATCGCGCCATTTA                                         | Cloning into pCL1920              |
| Ec zapB EcoRI         | GTCGAATTCTACCTGTTGGCCTACACAGT                                         | Cloning into pCL1920              |
| Ec amiA del F         | <u>gatataacatctggaactttattattacaactcagggcgtgtgtaggctggagctgcttc</u>   | <i>amiA682</i> deletion           |
| Ec amiA del R         | <u>caccagcaccgaaggaaccgacgggtgatttcaacaccacaatgggaattagccatggtcc</u>  | <i>amiA682</i> deletion           |
| Ec amiA del CK F      | aggctgattatggcgtgaac                                                  | To check deletion mutants         |
| Ec amiA del CK R      | acaccaccattacgcaacac                                                  | To check deletion mutants         |
| Ec amiB del F         | <u>gctggcgcggttagccgggttaacctttgaaaggtggcgggggtgtaggctggagctgcttc</u> | <i>amiB856</i> deletion           |
| Ec amiB del R         | <u>agccagctggccatttcaactggtggcgcgacgggttagagaatgggaattagccatggtcc</u> | <i>amiB856</i> deletion           |
| Ec amiB del CK F      | attggtgctggcgcggttag                                                  | To check deletion mutants         |
| Ec amiB del CK R      | ttctttgactaccgacgcag                                                  | To check deletion mutants         |
| Ec nlpD del F         | <u>ttatgtcactgggttattaaccaatcttctgggggataagtgtaggctggagctgcttc</u>    | <i>nlpD449</i> deletion           |
| Ec nlpD del R         | <u>caaggtctgaccaacgttcagcgcgtatggtgcctgaataatgggaattagccatggtcc</u>   | <i>nlpD449</i> deletion           |
| Ec nlpD del CK F      | tgcgctttgtcccttagtg                                                   | To check deletion mutants         |
| Ec nlpD del CK R      | agttcctcttcggccaaatc                                                  | To check deletion mutants         |
| Ec amiA SUMO F        | gccatcgccaaagacgaac                                                   | <i>amiA</i> cloning into pET-SUMO |
| Ec amiA SUMO R        | ctgtttaacctggtgtgcgt                                                  | <i>amiA</i> cloning into pET-SUMO |
| Ec amiB SUMO F        | tgctcttcgggtgcgacgctctctgatattca                                      | <i>amiB</i> cloning into pET-SUMO |

|                            |                                                               |                              |
|----------------------------|---------------------------------------------------------------|------------------------------|
| Ec amiB SUMO R             | gtaagacctgaattggcatc                                          | amiB cloning into pET-SUMO   |
| Ec envC SUMO F             | gatgagcgtgaccaactcaa                                          | envC cloning into pET-SUMO   |
| Ec envC SUMO R             | cgttacgacgaaatggaaac                                          | envC cloning into pET-SUMO   |
| Ec amiC SUMO F             | gcggtcagccaggtcgtg                                            | amiC cloning into pET-SUMO   |
| Ec amiC SUMO R             | cgccattcagcgccttttta                                          | amiC cloning into pET-SUMO   |
| Ec nlpD SUMO F             | tctgacacttcaaattccacc                                         | nlpD cloning into pET-SUMO   |
| Ec nlpD SUMO R             | cttgacggaacattcaagca                                          | nlpD cloning into pET-SUMO   |
| pET-SUMO F                 | caagctgatcagaccctga                                           | Sequencing pET-SUMO plasmids |
| pET-SUMO R                 | gcagccggatctcagtggg                                           | Sequencing pET-SUMO plasmids |
| <sup>b</sup> St envC del F | gactggtaagccgctgttcatcgtggaataatccctccccgtgtaggctggagctgcttc  | envC deletion                |
| St envC del R              | gccttgtagccagtcgccagaatcaccctgccgtcggcgatgggaattagccatgggcc   | envC deletion                |
| St envC del CK F           | CAGACATTGCGCCTACCATG                                          | To check deletion mutants    |
| St rfaL del F              | agagactctgtctcatcccaaacctattgtggagaaaaggtgtaggctggagctgcttc   | rfaL deletion                |
| St rfaL del R              | gaaaacgcgctgataccgtaataagtatcagcgcggtttttatgggaattagccatgggcc | rfaL deletion                |
| St rfaL del CK F           | ccacaagcgtatttggaaag                                          | To check deletion mutants    |
| St rfaL del CK R           | gtgattgagtcctgatgatg                                          |                              |
| St rfbB del F              | aattaaataccacattaaatacgccttatggaatagaaaagtgtaggctggagctgcttc  | rfbB deletion                |
| St rfbB del R              | caactctgatacgcgccacttttaacattgtttaccattatgggaattagccatgggcc   | rfbB deletion                |
| St rfbB del CK F           | gtgtaacgacttgagcaatt                                          | To check deletion mutants    |
| St rfbB del CK R           | ccttcatagttctgttctat                                          |                              |

<sup>a</sup>Ec indicates *E. coli* BW25113 and <sup>b</sup>St *Salmonella enterica* Typhimurium 14028s.

181  
182

183

**TABLE S3** Mutants identified as putatively hypersusceptible or hyper-resistant to HNP-1

| Mutants putatively identified as being hypersusceptible to HNP-1 |                             |                    |                        |                                                     |
|------------------------------------------------------------------|-----------------------------|--------------------|------------------------|-----------------------------------------------------|
| No.                                                              | Fold Change (Control/HNP-1) | Gene name          | JW annotation in W3110 | b annotation in K-12                                |
| 1                                                                | 9.20                        | <i>phnB</i>        | JW4068                 | b4107                                               |
| 2                                                                | 7.80                        | <i>yhcB</i>        | JW5539                 | b3233                                               |
| 3                                                                | 7.23                        | <i>pheM</i>        | JW1705                 | b1715                                               |
| 4                                                                | 6.75                        | <i>nanA</i>        | JW3194                 | b3225                                               |
| 5                                                                | 6.60                        | <i>fimB</i>        | JW4275                 | b4312                                               |
| 6                                                                | 6.28                        | <i>yhcM</i>        | JW3201                 | b3232                                               |
| 7                                                                | 5.84                        | <i>amiB</i>        | JW4127                 | b4169                                               |
| 8                                                                | 5.31                        | <i>yjbS</i>        | JW5717                 | b4054                                               |
| 9                                                                | 5.13                        | <i>yjgX</i>        | JW5763                 | No b annotation; located inside <i>yjgW</i> (b4274) |
| 10                                                               | 4.50                        | <i>glpR</i>        | JW3386                 | b3423                                               |
| 11                                                               | 4.44                        | <i>mdh</i>         | JW3205                 | b3236                                               |
| 12                                                               | 4.40                        | <i>pdhR</i>        | JW0109                 | b0113                                               |
| 13                                                               | 4.36                        | <i>yiiU (zapB)</i> | JW3899                 | b3928                                               |
| 14                                                               | 3.92                        | <i>yibP (envC)</i> | JW5646                 | b3613                                               |
| 15                                                               | 3.85                        | <i>yhhN</i>        | JW3433                 | b3428                                               |
| 16                                                               | 3.54                        | <i>yadM</i>        | JW0134                 | b0138                                               |
| 17                                                               | 3.48                        | <i>yeeA</i>        | JW1990                 | b2008                                               |
| 18                                                               | 3.21                        | <i>JW5728</i>      | JW5728                 | No b annotation                                     |
| 19                                                               | 3.13                        | <i>metA</i>        | JW3973                 | b4013                                               |
| 20                                                               | 3.04                        | <i>basR</i>        | JW4074                 | b4113                                               |
| 21                                                               | 2.65                        | <i>yjgH</i>        | JW4206                 | b4248                                               |
| 22                                                               | 2.51                        | <i>yjdC</i>        | JW5733                 | b4135                                               |
| 23                                                               | 2.47                        | <i>purH</i>        | JW3970                 | b4006                                               |
| 24                                                               | 2.37                        | <i>yagF</i>        | JW0262                 | b0269                                               |
| 25                                                               | 2.31                        | <i>glyS</i>        | JW3530                 | b3559                                               |
| 26                                                               | 2.26                        | <i>yjgL</i>        | JW5757                 | b4253                                               |
| 27                                                               | 2.26                        | <i>yddJ</i>        | JW1466                 | b1470                                               |
| 28                                                               | 2.20                        | <i>yciN</i>        | JW1265                 | b1273                                               |
| 29                                                               | 2.13                        | <i>pgi</i>         | JW3985                 | b4025                                               |
| 30                                                               | 2.12                        | <i>yhdY</i>        | JW5545                 | b3270                                               |
| 31                                                               | 2.05                        | <i>nikD</i>        | JW3444                 | b3479                                               |
| 32                                                               | 2.04                        | <i>recO</i>        | JW2549                 | b2565                                               |
| 33                                                               | 2.03                        | <i>iclR</i>        | JW3978                 | b4018                                               |
| 34                                                               | 2.03                        | <i>yggR</i>        | JW2917                 | b2950                                               |
| Mutants putatively identified as being hyper-resistant to HNP-1  |                             |                    |                        |                                                     |
| No.                                                              | Fold Change (Control/HNP-1) | Gene name          | JW annotation in W3110 | b annotation in K-12                                |
| 1                                                                | 0.0933                      | <i>pntB</i>        | JW1594                 | b1602                                               |
| 2                                                                | 0.0758                      | <i>atoA</i>        | JW2216                 | b2222                                               |



|   |        |             |        |       |
|---|--------|-------------|--------|-------|
| 3 | 0.0712 | <i>nhaA</i> | JW0018 | b0019 |
| 4 | 0.0683 | <i>cysB</i> | JW1267 | b1275 |
| 5 | 0.0603 | <i>tatA</i> | JW3813 | b3836 |

185  
186  
187  
188  
189  
190  
191  
192  
193  
194  
195  
196

**TABLE S4** MICs of HNP-1 and LL-37 against the  $\Delta envC$  mutant

| Strain              | MIC <sup>a</sup> (μg/ml) |       |
|---------------------|--------------------------|-------|
|                     | HNP-1                    | LL-37 |
| WT <sub>Ec</sub>    | >250                     | 7.8   |
| $\Delta envC$       | 62.5                     | 3.9   |
| $\Delta envC/penvC$ | >250                     | 7.8   |

197 <sup>a</sup>MIC was determined as described in the supplemental methods. Shown is the mean of values  
198 obtained from two independent experiments performed in duplicate, which gave identical results.

199 **TABLE S5** Proteins whose expression level is altered in the  $\Delta envC$  mutant relative to WT<sub>Ec</sub>

| Spot No. <sup>a</sup>                                      | Relative changes in $\Delta envC$ vs. WT <sub>Ec</sub> | Protein name | pI   | Description/Function                             |
|------------------------------------------------------------|--------------------------------------------------------|--------------|------|--------------------------------------------------|
| <i>From outer membrane protein samples run on 2-DE gel</i> |                                                        |              |      |                                                  |
| 1                                                          | Down                                                   | OmpA         | 5.99 | Outer membrane porin A                           |
|                                                            | Down                                                   | TolC         | 5.46 | Outer membrane channel protein                   |
|                                                            | Down                                                   | OmpT         | 5.76 | Outer membrane protease                          |
| 2                                                          | Down                                                   | FliC         | 4.5  | Flagella filament structural protein (flagellin) |
|                                                            | Down                                                   | OmpC         | 4.39 | Outer membrane porin C                           |
|                                                            | Down                                                   | LamB         | 4.62 | Maltose outer membrane porin                     |
|                                                            | Down                                                   | OmpF         | 4.57 | Outer membrane porin F                           |
| <i>From inner membrane protein samples run on 2-DE gel</i> |                                                        |              |      |                                                  |
| 3                                                          | Up                                                     | AcrB         | 5.15 | Acriflavin resistance protein B                  |
|                                                            | Up                                                     | AdhE         | 6.32 | Pyruvate-formate-lyase deactivase                |
|                                                            | Up                                                     | NuoG         | 5.85 | NADH:ubiquinone oxidoreductase subunit G         |
| 4                                                          | Down                                                   | HflC         | 6.29 | Inner membrane protein that regulates FtsH       |
|                                                            | Down                                                   | EmrA         | 9.33 | Inner membrane protein for the EmrAB efflux pump |

<sup>a</sup>See numbering in the 2-DE gel images in Fig. S7 in the Supplemental Information.

200  
201  
202

203  
204  
205

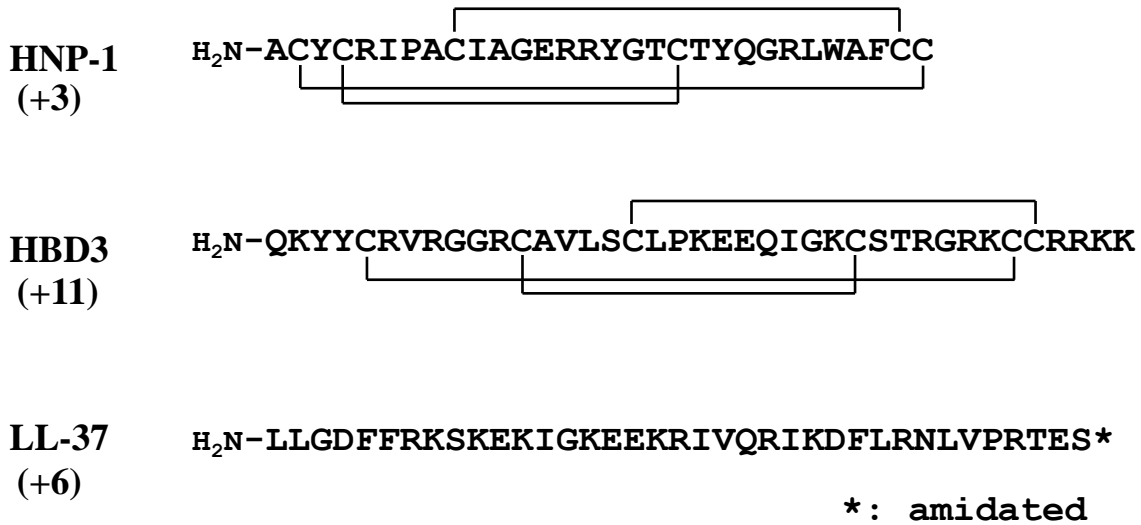

**Polymyxin B**  
(+5)

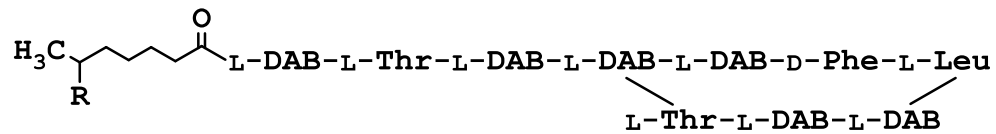

R:  $\text{CH}_3$  ( $\text{B}_1$ ),  $\text{CH}_2\text{CH}_3$  ( $\text{B}_2$ )

DAB: diaminobutyric acid

207  
208  
209  
210  
211  
212  
213  
214  
215  
216  
217  
218  
219  
220  
221  
222  
223  
224  
225  
226  
227  
228

**FIG S1** Cationic antimicrobial peptides used in this study. Numbers in parenthesis indicate the positive charges of respective peptides.  $\beta$ -sheet peptide: HNP-1 and HBD3;  $\alpha$ -helical peptide: LL-37; and cyclic lipopeptide: polymyxin B

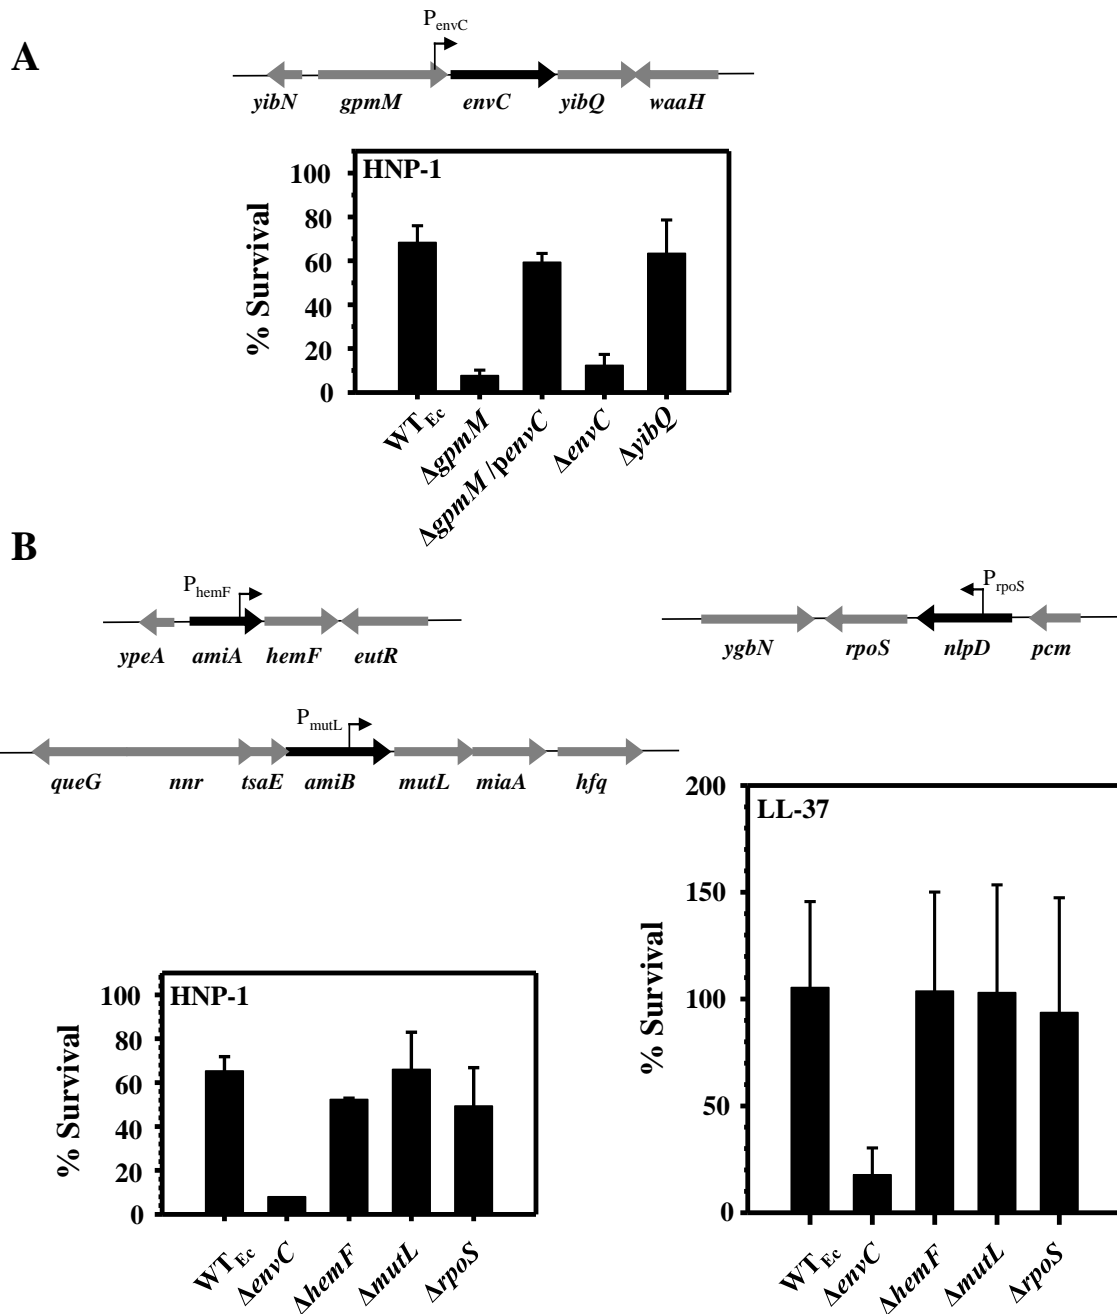

230  
231  
232  
233  
234  
235  
236  
237  
238

**FIG S2** The neighboring genes of *envC*, *amiA*, *amiB*, and *nlpD* are not involved in CAMP resistance. (A) Genetic organization of neighboring genes of *envC* in *E. coli*. (B) Genetic organization of neighboring genes of *amiA*, *amiB*, and *nlpD* in *E. coli*. Mutants deleted for the downstream gene of *amiA*, *amiB*, *envC*, or *nlpD* show wild-type susceptibility to both HNP-1 and LL-37. Wild-type *E. coli* and mutant strains grown to mid-log phase in LB were examined for HNP-1 (100  $\mu$ g/ml) or LL-37 (5  $\mu$ g/ml) susceptibility.

**A**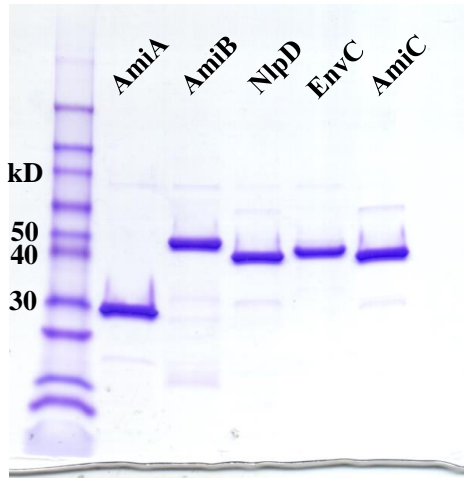**C**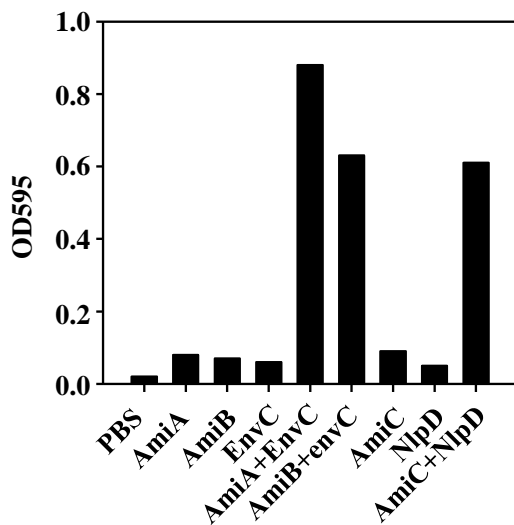**B**

Substrate: Dye-labeled peptidoglycan

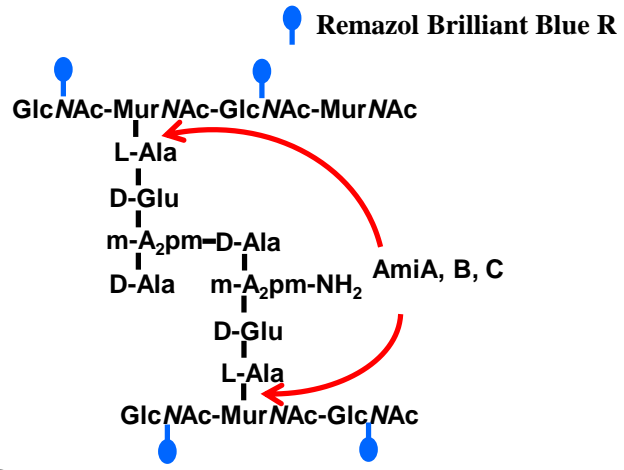**D**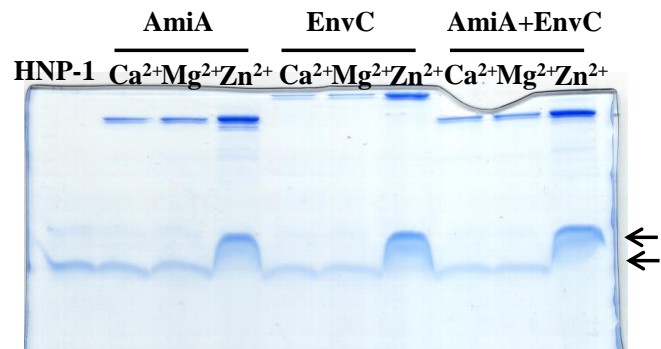

239  
 240  
 241  
 242  
 243  
 244  
 245  
 246  
 247  
 248  
 249  
 250  
 251  
 252  
 253

**FIG S3** EnvC and its cognate amidases do not degrade HNP-1. (A) Purified proteins were run on 4–20% SDS-polyacrylamide gel and stained with Coomassie Blue. (B) Dye-labeled peptidoglycan. (C) Cleavage of peptidoglycan by amidases (EnvC+AmiA; EnvC+AmiB; and NlpD+AmiC). (D) HNP-1 degradation assay (see Supplemental Methods for details). Arrows indicate intact HNP-1. The amidase (AmiB+EnvC) did not degrade HNP-1 (data not shown), and none of the amidases, (AmiA+EnvC), (AmiB+EnvC), and (AmiC+NlpD), cleaved LL-37 (data not shown).

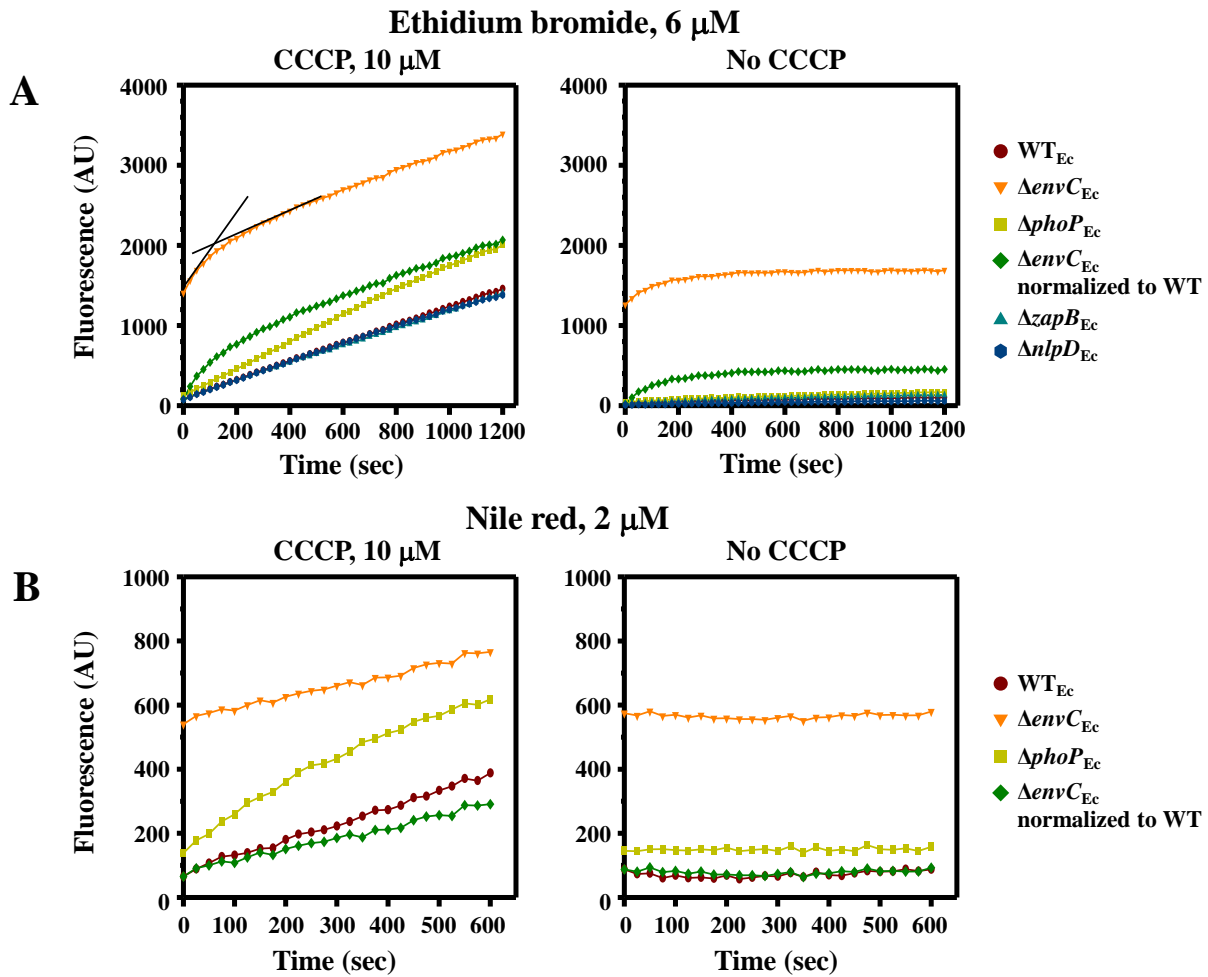

256  
257  
258  
259  
260  
261  
262  
263  
264  
265  
266  
267  
268  
269  
270  
271  
272  
273

**FIG S4** The *E. coli*  $\Delta envC$  mutant exhibits altered outer membrane permeability. Outer membrane permeability was determined by measuring the rate of fluorescent dye uptake using (A) Ethidium bromide and (B) Nile red. Values for “ $\Delta envC_{Ec}$  normalized to WT” were obtained by subtracting  $\Delta fluorescence_{t=0}$  ( $WT_{Ec} - \Delta envC_{Ec}$ , at zero time point) from values of  $\Delta envC_{Ec}$  at other time points. Note that the  $\Delta envC_{Ec}$  mutant exhibits bi-phasic uptake of ethidium bromide. Shown is a representative of more than three independent experiments with similar trends.

274

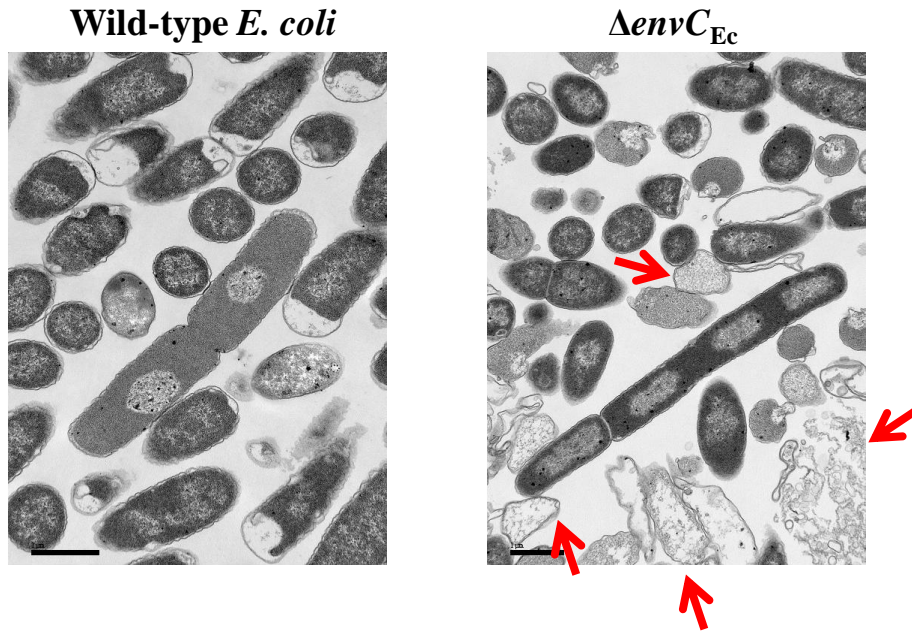

275

276

277

278

279 **FIG S5** Microscopic examination of the *E. coli* wild-type and  $\Delta envC$  strains. Transmission  
280 electron micrograph of wild-type *E. coli* and  $\Delta envC_{Ec}$  mutant strains. Wild-type *E. coli*,  $\times 28100$   
281 magnification and  $\Delta envC_{Ec}$ ,  $\times 22000$  magnification. Red arrows indicate ghost cells and cell  
282 debris, which are not observed in the wild-type.

283

284

285

286

287

288

289

290

291

292

293

294

295

296

297

298

299

300

301

302

303

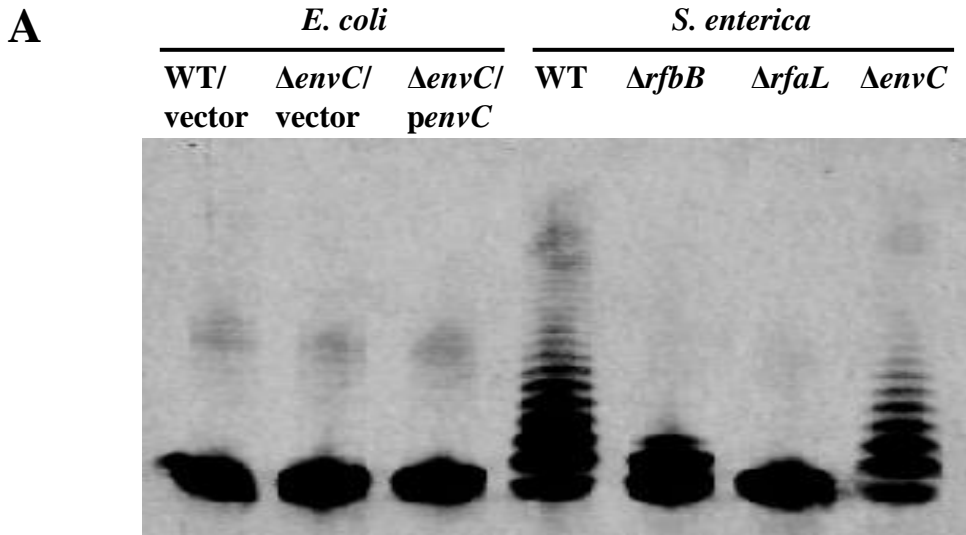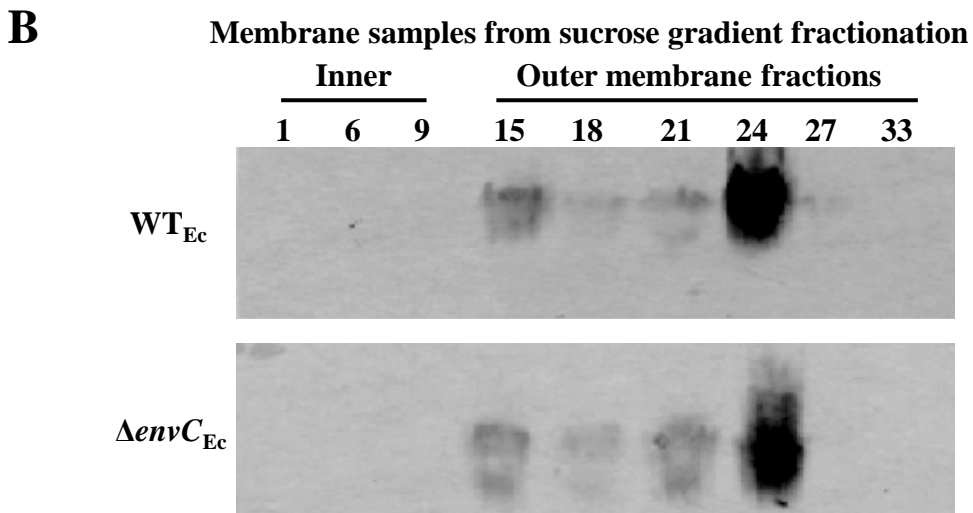

304  
305  
306  
307  
308  
309  
310  
311  
312  
313  
314  
315  
316  
317

**FIG S6** Inactivation of *envC* does not alter the length and distribution of LPS. (A) Western blot of lipid A for *E. coli* (BW25113) and *S. typhimurium* (14028s). *Salmonella*  $\Delta rfaL$  and  $\Delta rfbB$  mutants produce truncated LPS and are used as controls. (B) Western blot of lipid A in membrane fractions prepared by sucrose gradient fractionation: the inner membrane fractions (5-11) and outer membrane fractions (12-25).



318  
319

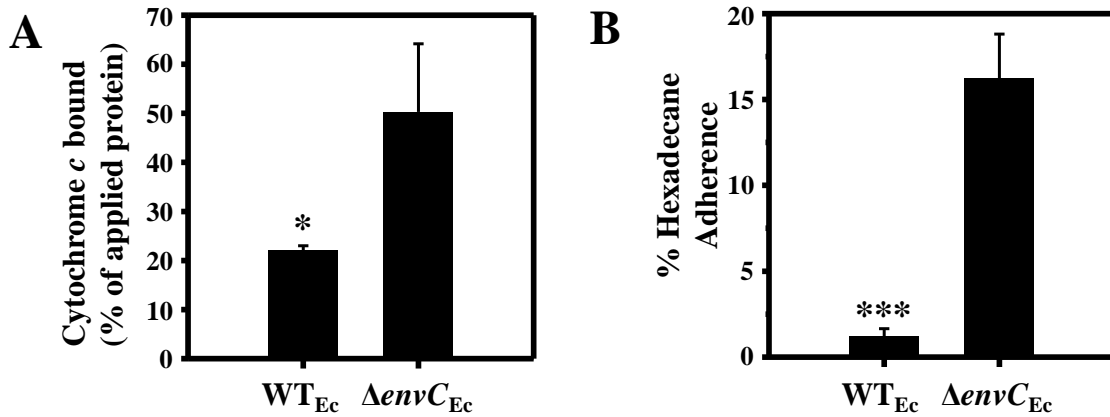

320  
321  
322  
323  
324  
325  
326  
327  
328  
329  
330  
331  
332  
333  
334  
335  
336  
337  
338  
339  
340  
341  
342  
343  
344  
345  
346  
347  
348  
349

**FIG S7** The *E. coli*  $\Delta envC$  mutant exhibits altered surface properties. (A) Surface charges was measured via binding of the cationic protein cytochrome *c* to cells and represented as the percent bound mean $\pm$ s.d. of three independent experiments performed in duplicate. (B) Hydrophobicity of cell surfaces was determined as adherence of cells to hexadecane and represented as the mean $\pm$ s.d. of three independent experiments. Statistical significance was determined by paired, two-tailed Student's *t*-test (\*,  $p < 0.05$  and \*\*\*,  $p < 0.001$ ).

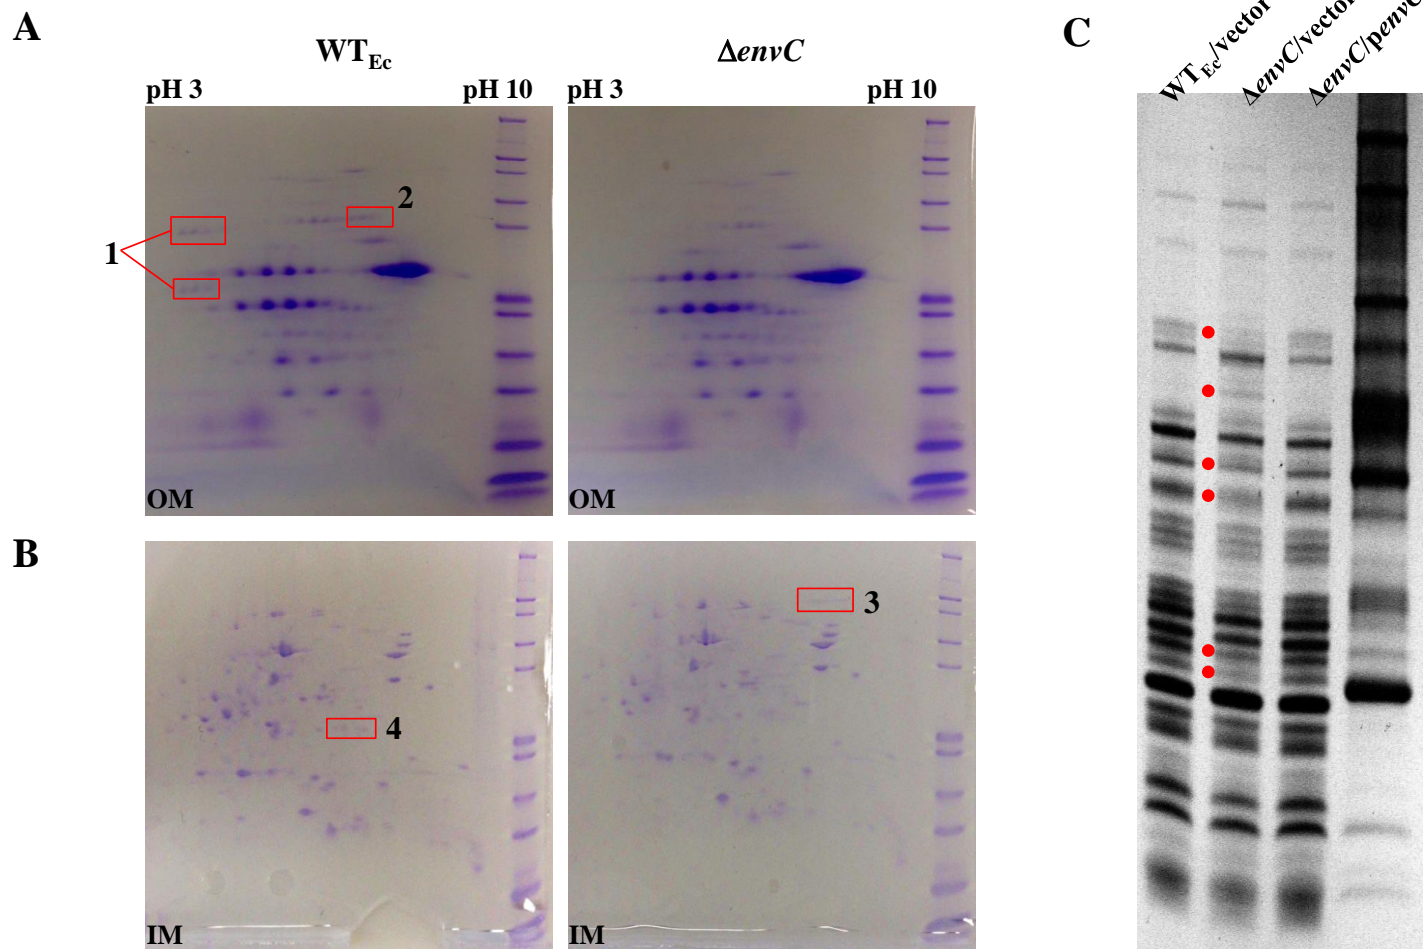

350  
351  
352  
353  
354  
355  
356

**FIG S8** Membrane and periplasmic protein profiles of the *E. coli* wild-type and  $\Delta envC$  strains. (A) Outer membrane (OM) protein samples (800  $\mu$ g each) run on 2-DE gels. (B) Inner membrane (IM) protein samples (800  $\mu$ g each). Protein spots in boxed area in 2-DE gels were excised and analyzed by mass spectrometry. Note that #1 is a combined sample. See Supplemental Methods for 2-DE procedures and Table S5 for the list of proteins identified by mass spectrometry. (C) Periplasmic protein samples (20  $\mu$ g each) were run on 4-20% TGX gel (Bio-rad) and visualized by Coomassie staining. Red dots indicate protein bands with pronounced changes in intensity and restored to wild-type levels upon genetic complementation.

357  
358

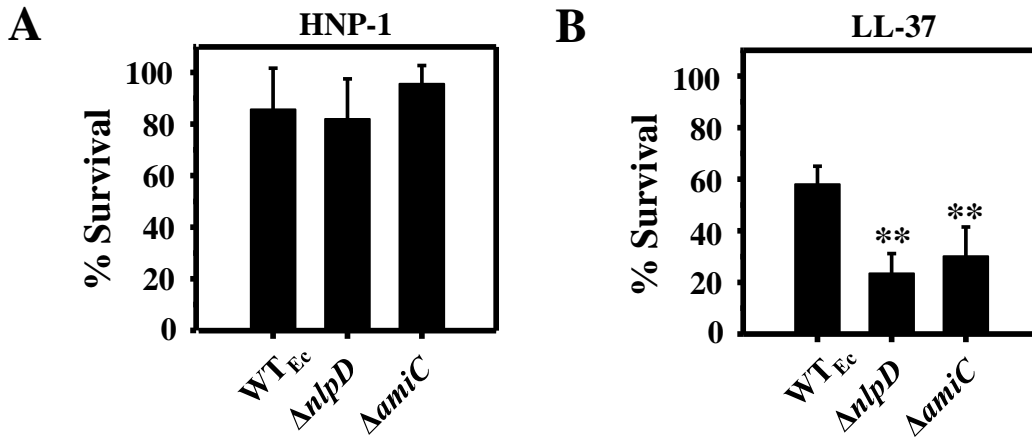

359  
360  
361  
362  
363  
364  
365  
366  
367  
368  
369  
370  
371  
372  
373

**FIG S9** The *E. coli*  $\Delta nlpD$  and  $\Delta amiC$  mutants are hypersusceptible to LL-37, but not to HNP-1. (A) HNP-1 (at 100  $\mu\text{g/ml}$ ) killing assay. (B) LL-37 (at 5  $\mu\text{g/ml}$ ) killing assay. A non-polar  $\Delta nlpD$  mutant was constructed (Table S1 and S2), and a mutant deleted for *rpoS*, the downstream gene of *nlpD*, was confirmed for wild-type HNP-1 and LL-37 susceptibilities (Fig. S2B). Killing assays for  $\Delta nlpD$  and  $\Delta amiC$  strains were performed at the same time with other strains shown in Fig. 3. Shown is the mean $\pm$ s.d. of three independent experiments. Statistical significance was determined by one-way ANOVA test (\*\*,  $p < 0.01$ ).

374 **Supplemental References**

- 375 1. **Turner J, Cho Y, Dinh N-N, Waring AJ, Lehrer RI.** 1998. Activities of LL-37, a  
376 cathelin-associated antimicrobial peptide of human neutrophils. *Antimicrob Agents*  
377 *Chemother* **42**:2206-2214.
- 378 2. **Uehara T, Dinh T, Bernhardt TG.** 2009. LytM-domain factors are required for  
379 daughter cell separation and rapid ampicillin-induced lysis in *Escherichia coli*. *J*  
380 *Bacteriol* **191**:5094-5107.
- 381 3. **Uehara T, Parzych KR, Dinh T, Bernhardt TG.** 2010. Daughter cell separation is  
382 controlled by cytokinetic ring-activated cell wall hydrolysis. *EMBO J* **29**:1412-1422.
- 383 4. **Thomassin J-L, Lee MJ, Brannon JR, Sheppard DC, Gruenheid S, Le Moual H.**  
384 2013. Both group 4 capsule and lipopolysaccharide O-antigen contribute to  
385 enteropathogenic *Escherichia coli* resistance to human  $\alpha$ -defensin 5. *PLoS ONE*  
386 **8**:e82475.
- 387 5. **Sperandeo P, Lau FK, Carpentieri A, De Castro C, Molinaro A, Dehò G, Silhavy**  
388 **TJ, Polissi A.** 2008. Functional analysis of the protein machinery required for transport  
389 of lipopolysaccharide to the outer membrane of *Escherichia coli*. *J Bacteriol* **190**:4460-  
390 4469.
- 391 6. **Davis JMR, Goldberg JB.** 2012. Purification and visualization of lipopolysaccharide  
392 from Gram-negative bacteria by hot aqueous-phenol extraction. *J Vis Exp* **28**:e3916.
- 393 7. **Marani P, Wagner S, Baars L, Genevaux P, De Gier J-W, Nilsson I, Casadio R, Von**  
394 **Heijne G.** 2006. New *Escherichia coli* outer membrane proteins identified through  
395 prediction and experimental verification. *Protein Sci* **15**:884-889.

- 396 8. **Reusch VM, Burger MM.** 1974. Distribution of marker enzymes between mesosomal  
397 and protoplast membranes. *J Biol Chem* **249**:5337-5345.
- 398 9. **Yakhnina AA, McManus HR, Bernhardt TG.** 2015. The cell wall amidase AmiB is  
399 essential for *Pseudomonas aeruginosa* cell division, drug resistance and viability. *Mol*  
400 *Microbiol* **97**:957-973.
- 401 10. **Sato T, Ito K, Yura T.** 1977. Membrane proteins of *Escherichia coli* K-12: Two-  
402 dimensional polyacrylamide gel electrophoresis of inner and outer membranes. *Eur J*  
403 *Biochem* **78**:557-567.
- 404 11. **Ames GF, Prody C, Kustu S.** 1984. Simple, rapid, and quantitative release of  
405 periplasmic proteins by chloroform. *J Bacteriol* **160**:1181-1183.
- 406 12. **Lange R, Fischer D, Hengge-Aronis R.** 1995. Identification of transcriptional start sites  
407 and the role of ppGpp in the expression of *rpoS*, the structural gene for the sigma S  
408 subunit of RNA polymerase in *Escherichia coli*. *J Bacteriol* **177**:4676-4680.
- 409 13. **Datsenko KA, Wanner BL.** 2000. One-step inactivation of chromosomal genes in  
410 *Escherichia coli* K-12 using PCR products. *Proc Natl Acad Sci U S A* **97**:6640-6645.
- 411 14. **Grenier F, Matteau D, Baby V, Rodrigue S.** 2014. Complete genome sequence of  
412 *Escherichia coli* BW25113. *Genome Announc* **2**:e01038-01014.
- 413 15. **Baba T, Ara T, Hasegawa M, Takai Y, Okumura Y, Baba M, Datsenko KA, Tomita**  
414 **M, Wanner BL, Mori H.** 2006. Construction of *Escherichia coli* K-12 in-frame, single-  
415 gene knockout mutants: the Keio collection. *Mol Syst Biol* **2**:2006.0008.
- 416 16. **Lerner CG, Inouye M.** 1990. Low copy number plasmids for regulated low-level  
417 expression of cloned genes in *Escherichia coli* with blue/white insert screening  
418 capability. *Nucleic Acids Res* **18**:4631.
